# Supplementary material for: Controllable electrolytic formation of Ti2O as an efficient sulfur host in lithium–sulfur (Li–S) batteries
Source: Royal Society of Chemistry journal article supplement (doi:10.1039/d0ta01454k), 2020-01-01
Supplement: d0ta01454k1.pdf [file d0ta01454k1.pdf]

## **Controllably Electrolytic Formation of Ti<sub>2</sub>O as Efficient Sulfur Host in lithium-sulfur (Li-S) battery**

*Ruxing Wang<sup>a</sup>, Kangli Wang<sup>a\*</sup>, Hongwei Tao<sup>a</sup>, Wenjie Zhao<sup>b</sup>, Mao Jiang<sup>b</sup>, Jie Yan<sup>b</sup>, Kai Jiang<sup>a\*</sup>*

*<sup>a</sup>State Key Laboratory of Advanced Electromagnetic Engineering and Technology, School of  
Electrical and Electronic Engineering, Huazhong University of Science and Technology, Wuhan,  
Hubei 430074, China.*

*<sup>b</sup>State Key Laboratory of Materials Processing and Die & Mould Technology, School of Materials  
Science and Engineering, Huazhong University of Science and Technology, Wuhan, Hubei 430074,  
China.*

E-mail: [kjiang@hust.edu.cn](mailto:kjiang@hust.edu.cn); [klwang@hust.edu.cn](mailto:klwang@hust.edu.cn)

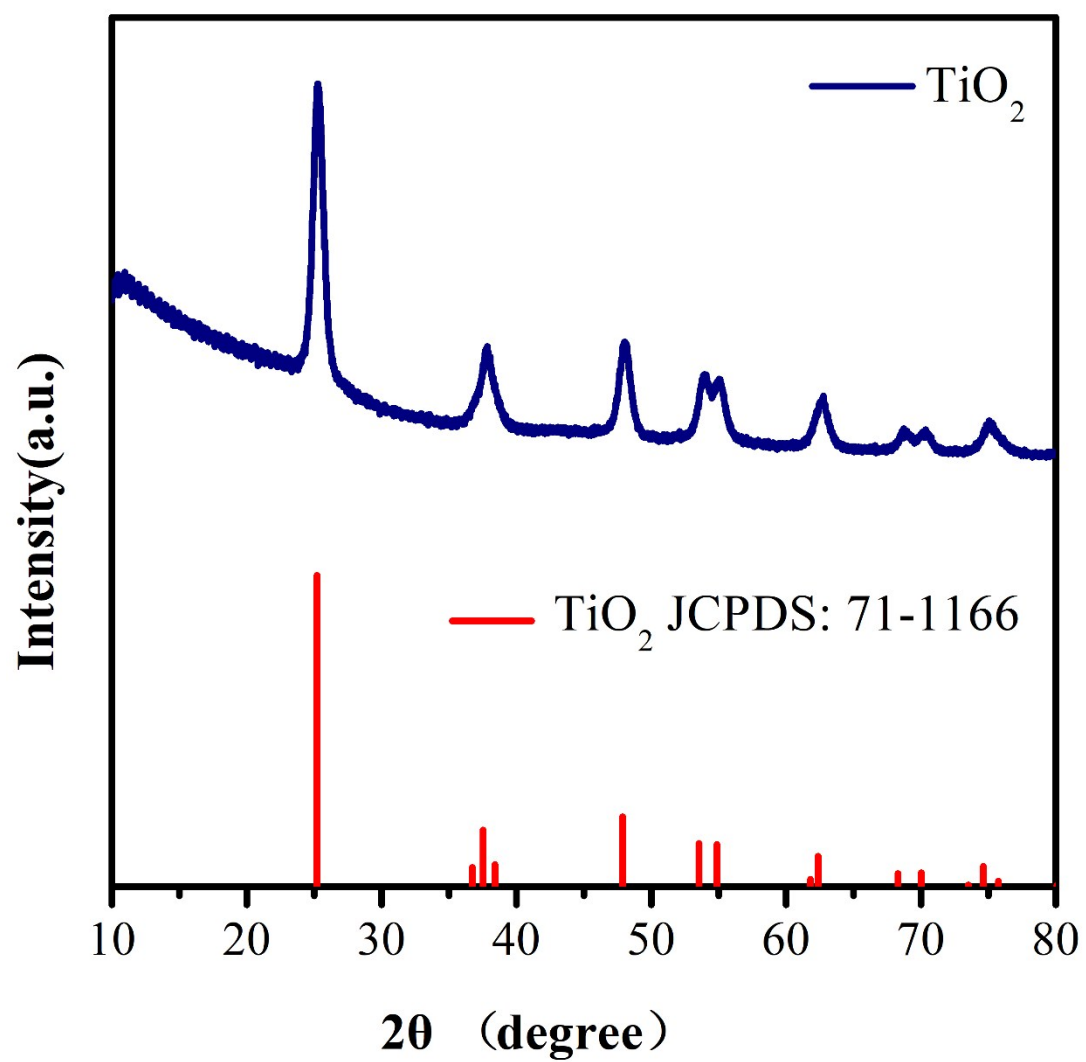

**Figure S1.** XRD patterns of the pristine  $\text{TiO}_2$

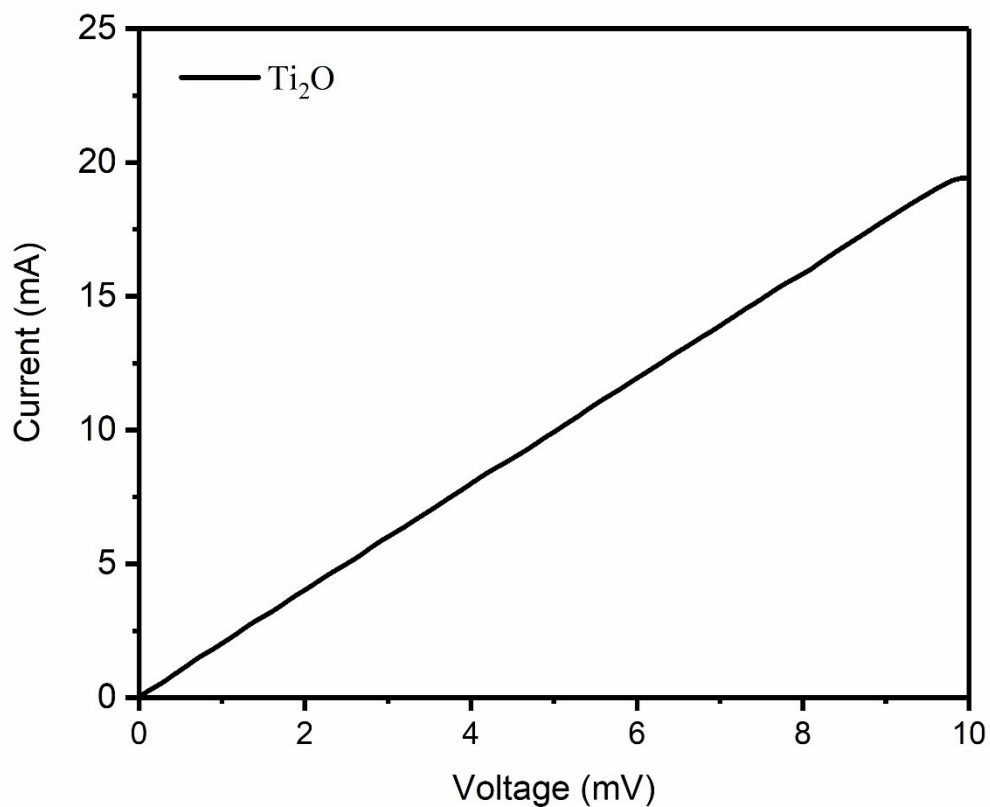

**Figure S2.** Electronic conductivity of the as-prepared  $\text{Ti}_2\text{O}$ . Based on the I-V analysis, the electronic conductivity of  $\text{Ti}_2\text{O}$  is calculated to be  $296.8 \text{ S m}^{-1}$ .

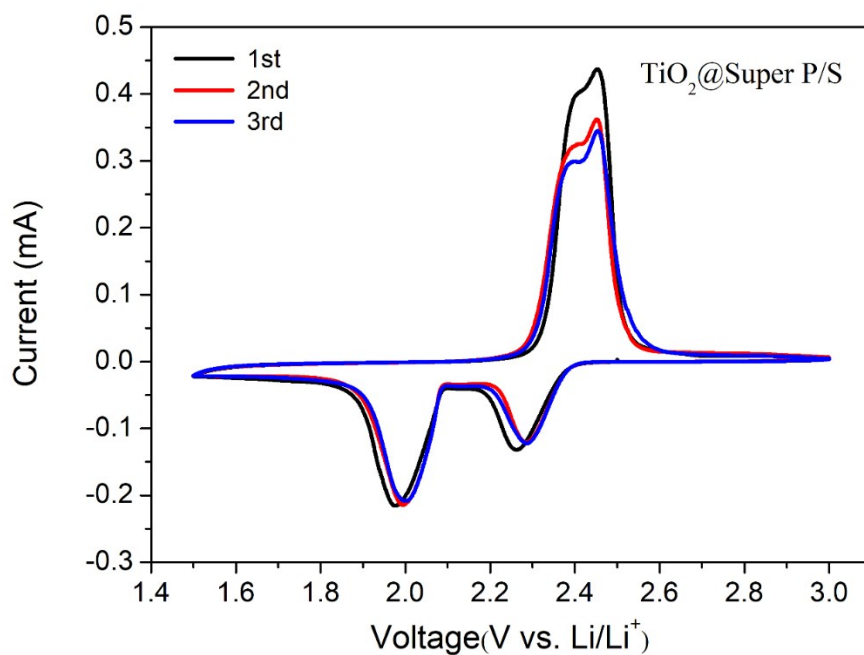

**Figure S3.** CV curves of the initial four cycles of the  $\text{TiO}_2@\text{super P/S}$  cathode at a scan rate of  $0.1 \text{ mV s}^{-1}$ .

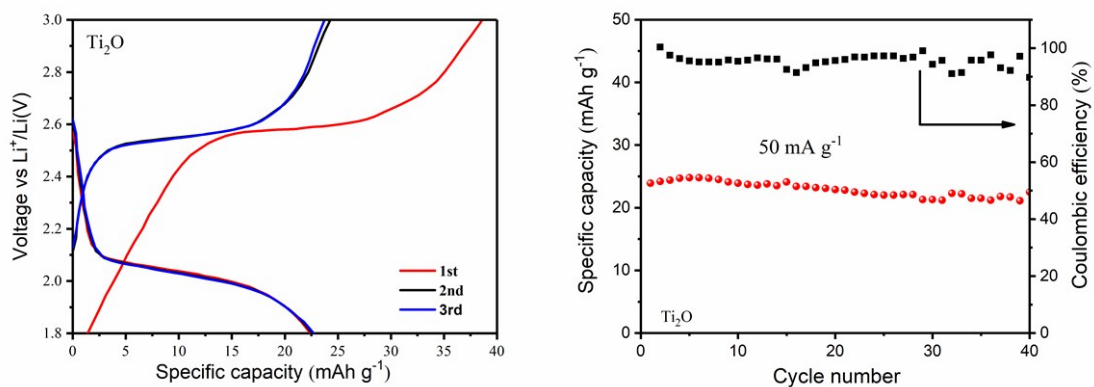

**Figure S4** Charge/discharge curves of the  $\text{Ti}_2\text{O}$  cathode and the corresponding cycle performance at  $50 \text{ mA g}^{-1}$ .

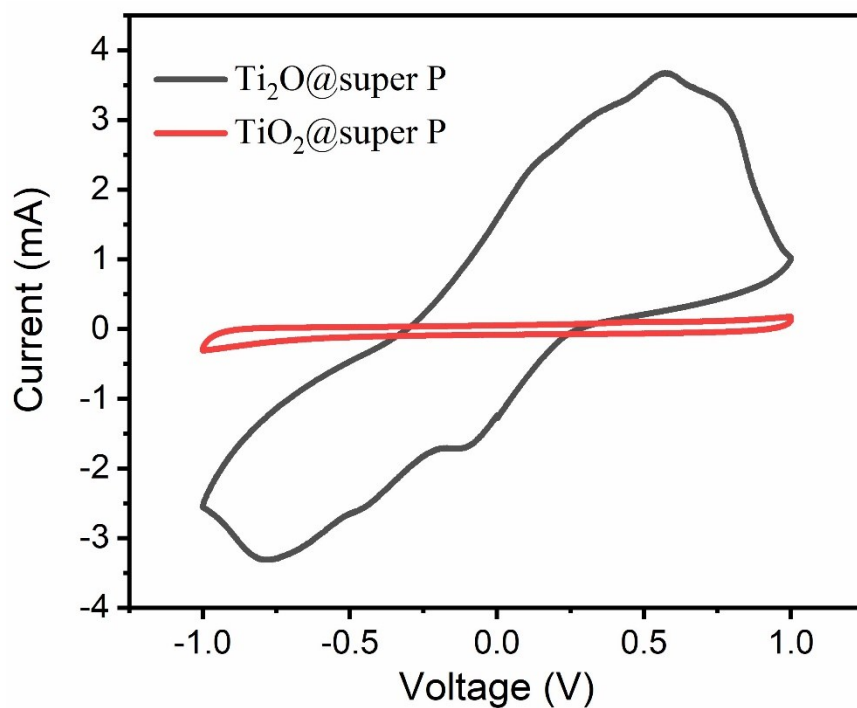

**Figure S5.** CV of symmetric cells. **Fig. S7** Cyclic voltammograms of  $\text{Li}_2\text{S}_4$  symmetric cells.

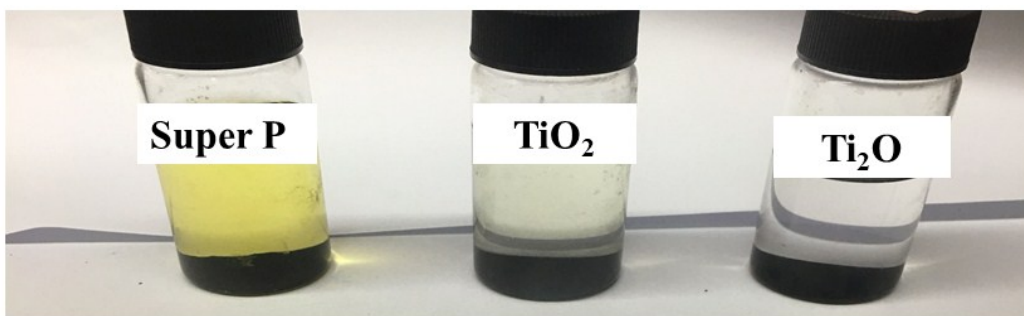

Figure S6.  $\text{Li}_2\text{S}_6$  solution with Super P,  $\text{TiO}_2$  or  $\text{Ti}_2\text{O}$  after resting for 1 h.

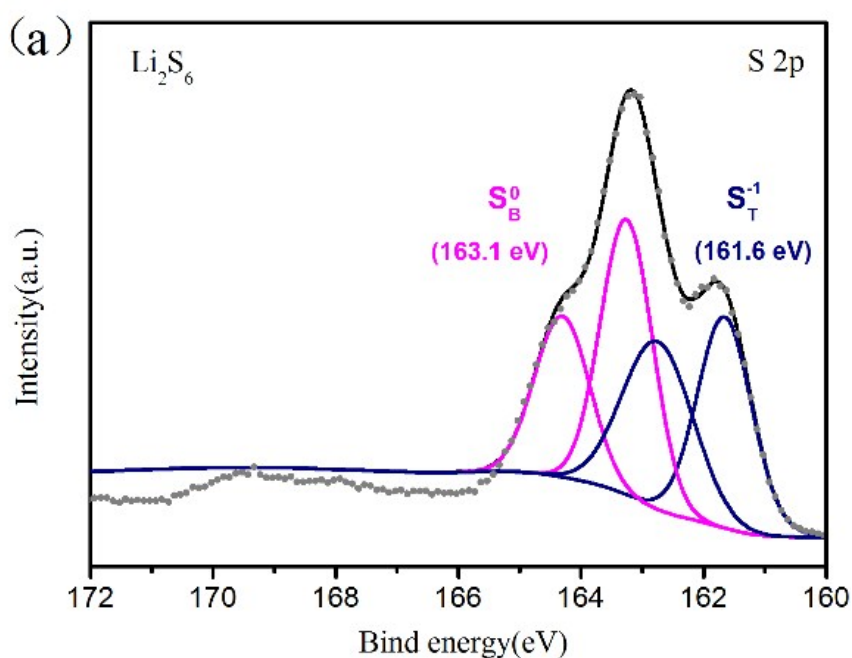

Figure S7. S 2p XPS spectra of  $\text{Li}_2\text{S}_6$ .

**Theoretical calculation:** The adsorptions of  $\text{Li}_2\text{S}_4$  on  $\text{Ti}_2\text{O}$  and  $\text{TiO}_2$  surfaces were investigated by the Vienna Ab-initio Simulation Package (VASP). The exchange-correlation function was described by the Perdew-Burke-Ernzerhof (PBE) of the generalized gradient approximation (GGA). The PAW pseudo-potential was used to describe the interaction between valence electrons and the ionic core.  $3 \times 3 \{001\}$  supercell with two Ti-O layers and  $2 \times 3 \{101\}$  supercell with eight Ti-O layers were used to simulate the surfaces of  $\text{Ti}_2\text{O}$  and  $\text{TiO}_2$ . The plane-wave basis with energy cutoff

of 400 eV and the energy convergence of  $1.0 \times 10^{-5}$  eV were applied to the calculations of geometry optimization. Considering the computational cost, the geometry optimization calculations were only performed at the gamma point.

In the test, 0.05 M  $\text{Li}_2\text{S}_6$  solution was placed in the left side of the cell, equal amount blank solvent was put in the right side. A G/ $\text{Ti}_2\text{O}$  or PP separator was placed at the bridge of the device.

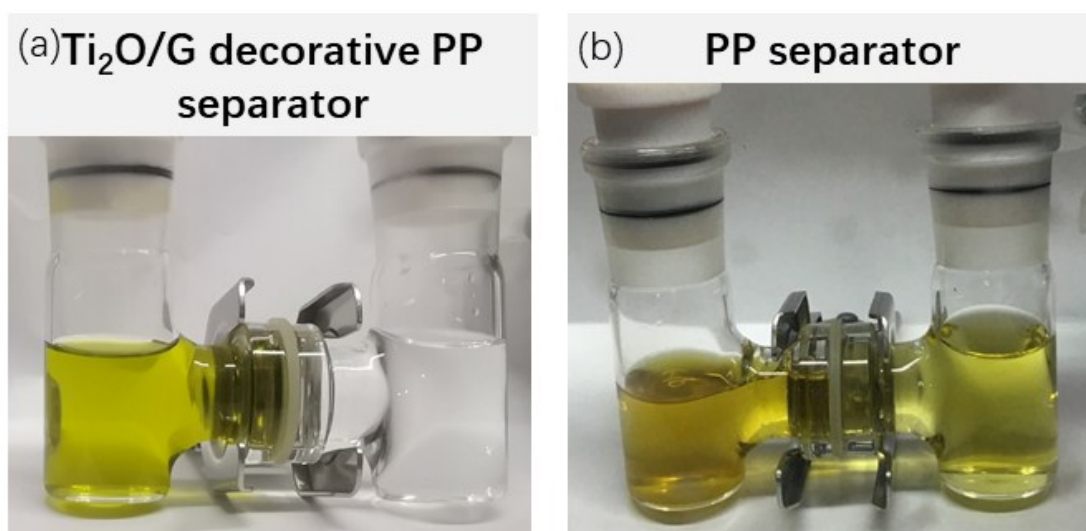

Figure S8. The verification of polysulfide immobilization with G/ $\text{Ti}_2\text{O}$  decorated separator (a) and commercialized PP separator (b) after resting for 5 hours.

**The illustration of the fitting unit of the equivalent circuits for EIS fitting:**

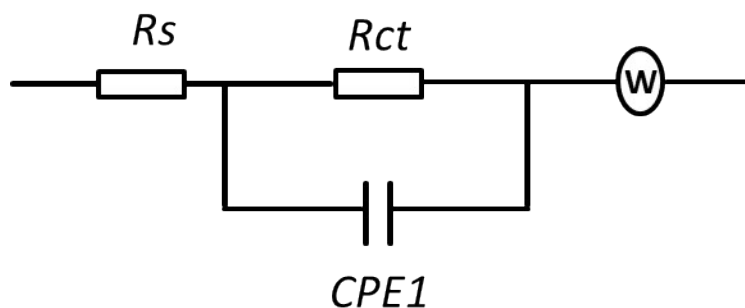

Figure S9. The equivalent circuits for EIS fitting before cycling test.

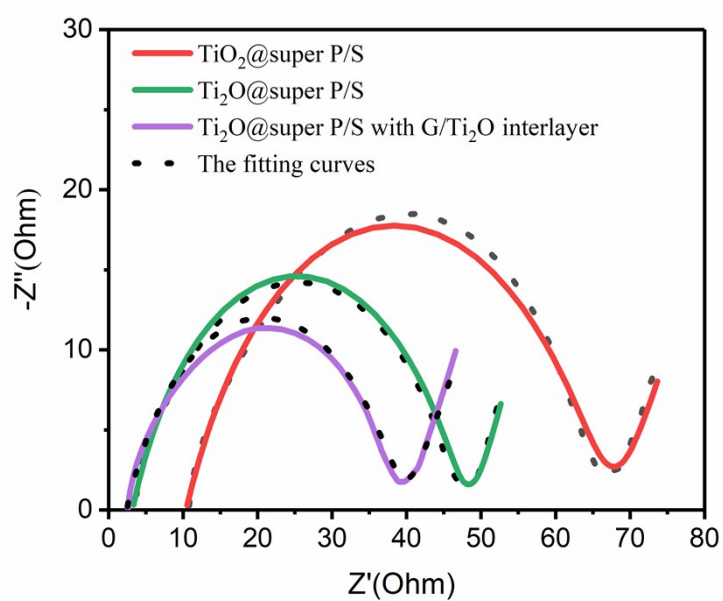

**Figure S10** The Nyquist plots of the  $\text{TiO}_2@\text{super P/S}$ ,  $\text{Ti}_2\text{O}@\text{super P/S}$  electrode and  $\text{Ti}_2\text{O}@\text{super P/S}$  with G/ $\text{Ti}_2\text{O}$  decorated separator cathode. The lines represent the measured results, and the dots correspond to the fitting curves.

**Table S1** The fitting results of the electrochemical impedance spectroscopy

|                                                                                             | $R_s (\Omega)$ | $R_{ct} (\Omega)$ |
|---------------------------------------------------------------------------------------------|----------------|-------------------|
| $\text{TiO}_2@\text{super P/S}$                                                             | 10.4           | 54.4              |
| $\text{Ti}_2\text{O}@\text{super P/S}$                                                      | 3.2            | 43.5              |
| $\text{Ti}_2\text{O}@\text{super P/S}$ with<br>G/ $\text{Ti}_2\text{O}$ decorated separator | 2.4            | 35.4              |

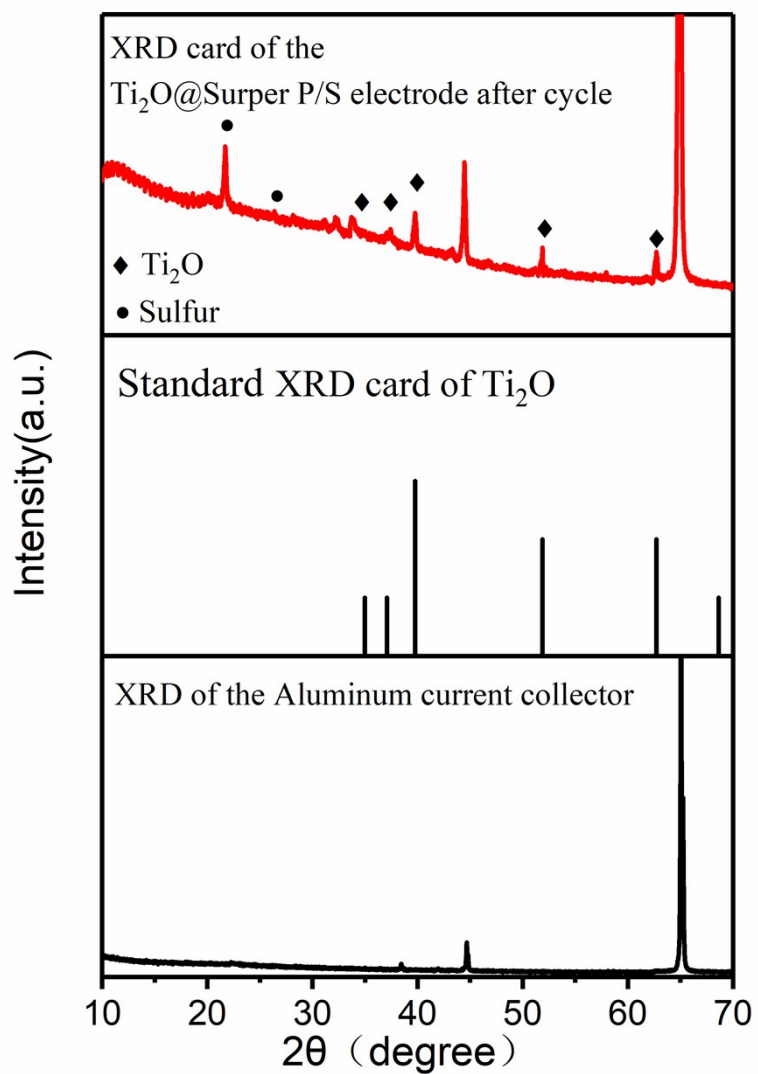

**Figure S11** Ex situ XRD patterns of  $\text{TiO}_2@$ super P/S electrode after 500 cycles.



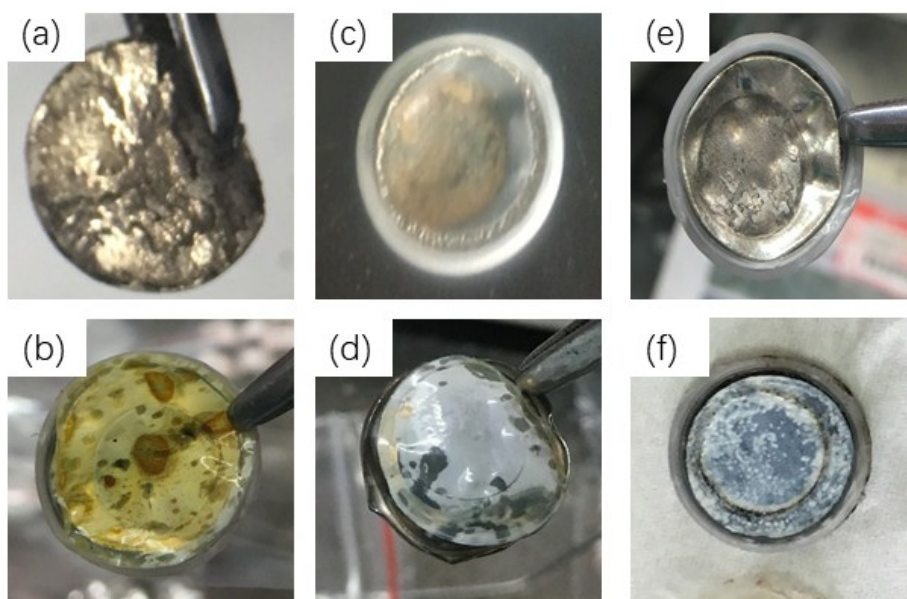

**Figure S12.** Lithium sheets and separators toward the side of the lithium sheet after cycled. (a) (b)  $\text{TiO}_2@\text{super P/S}$  cell, (c) (d)  $\text{Ti}_2\text{O}@\text{super P/S}$  cell, (e) (f)  $\text{Ti}_2\text{O}@\text{super P/S}$  with G/ $\text{Ti}_2\text{O}$  decorated separator

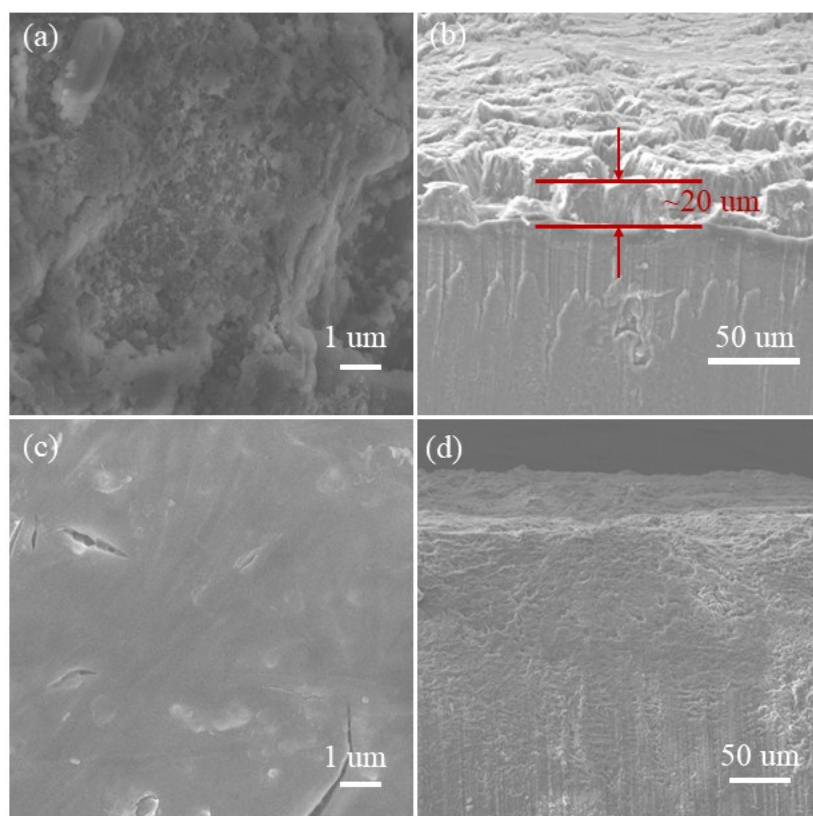

**Figure S13** SEM images of battery components after tests. The surface morphologies of the Li anode that facing the  $\text{TiO}_2@\text{super P/S}$  (a) and  $\text{Ti}_2\text{O}@\text{super P/S}$  with G/ $\text{Ti}_2\text{O}$  decorated separator (c) cathodes, and the corresponding cross-sections (b) (d).

**Table S2.** Electrochemical properties comparison of our work with other Ti-Based Oxides for Lithium-Sulfur Batteries

| Cathode hosts                             | Areal active material<br>mass loading | Current<br>Rate | Initial capacity<br>[mAh g <sup>-1</sup> ] | cycles     | Retention/ fading<br>rate [%] | Reference                               |
|-------------------------------------------|---------------------------------------|-----------------|--------------------------------------------|------------|-------------------------------|-----------------------------------------|
| CNT@TiO <sub>2-x</sub> -S [1]             | ~2.2                                  | 0.2             | 1204                                       | 150        | 72.01/0.19                    | <i>Adv. Energy Mater.</i> 2019          |
| TiO <sub>2</sub> -Ar/S [2]                | NA                                    | 0.2             | 1472                                       | 100        | 61.14/0.39                    | <i>J. Mater. Chem. A</i> , 2019         |
| S@3S-TiO <sub>2-x</sub> [3]               | ~0.5                                  | 0.5             | 903                                        | 1000       | 79                            | <i>Angew. Chem.</i> 2019                |
| TiO@C-HS [4]                              | ~1.5                                  | 0.5             | 1066                                       | 500        | 0.08                          | <i>Nat. Commun.</i> , 2016              |
| HCS@Ti <sub>4</sub> O <sub>7</sub> /S [5] | NA                                    | 0.5             | 1168                                       | 800        | 76/0.06                       | <i>J. Mater. Chem. A</i> , 2019         |
| H-TiO <sub>x</sub> @S/ppy [6]             | ~1.0                                  | 1.0C            | 693.7                                      | 1000       | 59.35/0.04                    | <i>ACS Appl. Mater. Interfaces</i> 2019 |
| TiO <sub>2n-1</sub> @C/S [7]              | ~2.3                                  | 1.0C            | 700                                        | 1000       | 0.06                          | <i>ChemSusChem</i> 2018                 |
| C@TiO <sub>2</sub> @C-S [8]               | ~2.5                                  | 0.5C            | 999                                        | 300        | 74/0.086                      | <i>J. Mater. Chem. A</i> , 2018         |
| Ti <sub>2</sub> O <sub>3</sub> -MA/S [9]  | ~1.5                                  | 0.5C            | 1060                                       | 250        | 81.1/0.08                     | <i>ACS Appl. Mater. Interfaces</i> 2019 |
| <b>Ti<sub>2</sub>O@Super P/S</b>          | <b>~2.5</b>                           | <b>0.5C</b>     | <b>1063</b>                                | <b>500</b> | <b>81.1/0.04</b>              | <b>This work</b>                        |

## Reference

- [1] Y. Wang, R. Zhang, J. Chen, H. Wu, S. Lu, K. Wang, H. Li, C. J. Harris, K. Xi and R. V. Kumar, *Advanced Energy Materials*, 2019, **9**, 1900953.
- [2] H.-E. Wang, K. Yin, N. Qin, X. Zhao, F.-J. Xia, Z.-Y. Hu, G. Guo, G. Cao and W. Zhang, *Journal of Materials Chemistry A*, 2019, **7**, 10346-10353.
- [3] E. H. M. Salhab, J. Zhao, J. Wang, M. Yang, B. Wang and D. Wang, *Angewandte Chemie*, 2019.
- [4] Z. Li, J. Zhang, B. Guan, D. Wang, L.-M. Liu and X. W. D. Lou, *Nature communications*, 2016, **7**, 13065.
- [5] F. Wang, X. Ding, R. Shi, M. Li, Y. Lei, Z. Lei, G. Jiang, F. Xu, H. Wang and L. Jia, *Journal of Materials Chemistry A*, 2019, **7**, 10494-10504.
- [6] G. Chen, W. Zhong, Y. Li, Q. Deng, X. Ou, Q. Pan, X. Wang, X. Xiong, C. Yang and M. Liu, *ACS applied materials & interfaces*, 2019, **11**, 5055-5063.
- [7] U. Zubair, J. Amici, C. Francia, D. McNulty, S. Bodoardo and C. O'Dwyer, *ChemSusChem*, 2018
- [8] M. Fang, Z. Chen, Y. Liu, J. Quan, C. Yang, L. Zhu, Q. Xu and Q. Xu, *J. Mater. Chem. A*, 2018, **6**, 1630-1638.
- [9] P. Zeng, M. Chen, S. Jiang, Y. Li, X. Xie, H. Liu, X. Hu, C. Wu, H. Shu and X. Wang, *ACS applied materials & interfaces*, 2019.
